# Supplementary material for: Plasmon-Activated Water Decreases Vasculopathy in Orthotopic Allograft Transplantation Rats
Source: Research Square preprint supplement (doi:10.21203/rs.3.rs-125516/v1), 2020-12-28
Supplement: Supplementary file 1 [file dbb498fc548b745980beaf9e.docx]

**Table 1. Comparison of Biochemical Parameters in Experimental ACI//NKyo Rats.**

|  | **Control ACI/NKyo**  **(non-OAT)** | |  | **OAT+ROW**  **(PVG/Seac to ACI/NKyo)** | |  | **OAT+PAW**  **(PVG/Seac to ACI/NKyo)** | |
| --- | --- | --- | --- | --- | --- | --- | --- | --- |
|  | baseline | 90 days |  | baseline | 90 days |  | baseline | 90 days |
| **Body weight (g)** | 240.3±18.6 | 350.1±16.7 | 220.9±12.8 | 332.5±15.6 | 234.6±10.2 | 365.7±13.4 |
| **BUN (mg/dL)** | 26.5±5.6 | 30.0±5.9 | 26.8±9.0 | 29.5±6.1 | 25.4±7.1 | 29.8±6.8 |
| **Creatinine (mg/dL)** | 0.6±0.1 | 0.7±0.2 | 0.8±0.5 | 0.8±0.3 | 0.9±0.3 | 0.9±0.2 |
| **ALT (IU/L)** | 19.9±6.7 | 22.8±9.1 | 21.3±6.5 | 23.5±9.1 | 25.4±3.8 | 20.6±1.9 |
| **AST (IU/L)** | 30.5±6.1 | 32.5±8.1 | 30.5±3.6 | 30.6±8.1 | 29.8±9.9 | 30.5±9.1 |

OAT, orthotopic aortic transplantation; BW, body weight; BUN, blood urea nitrogen; ALT, alanine transaminase; AST, aspartate transaminase; Values are represented as mean ± SD. a*p* < 0.05 compared with baseline of the same group; b*p* < 0.05 compared with Control ACI/NKyo (non-OAT) group at the same time point; c*p* < 0.05 compared with OAT+ROW (PVG/Seac to ACI/NKyo) group at the same time point. Statistical evaluations were performed using one-way ANOVA.

**Table 2. Comparison of OAT-induced Vasculopathy-related Proteins in ACI//NKyo Rats.**

|  | **Control ACI/NKyo**  **(non-OAT)** | |  | **OAT+ROW**  **(PVG/Seac to ACI/NKyo)** | |  | **OAT+PAW**  **(PVG/Seac to ACI/NKyo)** | |
| --- | --- | --- | --- | --- | --- | --- | --- | --- |
|  | baseline | 90 days | baseline | 90 days | baseline | 90 days |
| **LDH (IU/L)** | 900.5±99.5 | 895.9±125.6 | 854.6±152.5 | 1888.78±323.0ab | 802.3±152.0 | 968.8±116.4c |
| **CRP (mg/dL)** | 40.2±13.5 | 39.6±9.1 | 39.4±9.8 | 163.5±22.5ab | 26.5±8.1 | 72.1±5.4abc |
| **HMGB1 (ng/mL)** | 2.7±1.4 | 2.8±1.3 | 3.4±1.5 | 98.7±19.7ab | 2.5±1.4 | 55.4±13.1abc |
| **SDF-1**α **(pg/mL)** | 200.3±22.6 | 196.5±52.1 | 220.1±41.5 | 432.6±100.4ab | 241.3±54.1 | 1211.4±130.2abc |
| **TGF-β1 (ng/mL)** | 66.3±21.2 | 78.9±25.4 | 72.4±19.7 | 378.1±55.9ab | 72.1±22.0 | 129.7±54.1abc |
| **INF-γ (pg/mL)** | 2.5±0.8 | 3.1±0.9 | 1.5±0.7 | 18.7±5.3ab | 1.9±0.8 | 3.5±1.2c |
| **IL-2 (pg/mL)** | 45.7±13.5 | 56.8±18.9 | 53.7±21.5 | 899.4±102.4ab | 45.2±21.0 | 352.4±95.7abc |

OAT, orthotopic aortic transplantation; LDH, lactic dehydrogenase; CRP, C-reactive protein; HMGB1, high mobility group box 1 protein; INF-**γ**, interferon **γ**; TGF-β1, transforming growth factor- beta 1; SDF-1α, stromal cell-derived factor 1α; IL-2, interleukin 2; Values are represented as mean±SD. a*p* < 0.05 compared with baseline of the same group; b*p* < 0.05 compared with control ACI**/**NKyo (non-OAT) group at the same time point; c*p* < 0.05 compared with OAT+ROW (PVG/Seac to ACI/NKyo) group at the same time point. Statistical evaluations were performed using one-way ANOVA.
